# Supplementary material
Source: HighWire-hosted journal article supplement (https://thorax.bmj.com/content/thoraxjnl-2020-215383)
Supplement: inline-supplementary-material-1 [file inline-supplementary-material-1.pdf]

## **SUPPLEMENTARY MATERIAL - APPENDIX**

### **EQUATION SEARCH**

#### **Pubmed**

("thrombosis"[MeSH Terms] OR "thrombosis"[All Fields]) OR ("Peripheral Arterial Disease"[Mesh] OR "ischemia"[All Fields] OR "Ischemia"[Mesh] OR "Mesenteric Ischemia"[Mesh] OR "stroke"[MeSH Terms] OR "stroke"[All Fields] OR "myocardial infarction"[MeSH Terms] OR "infarction"[All Fields] OR "myocardial infarction"[All Fields] OR "acute coronary syndrome"[MeSH Terms] OR "acute coronary syndrome"[All Fields] OR "venous thrombosis"[MeSH Terms] OR "deep venous thrombosis"[All Fields] OR "venous thromboembolism"[MeSH Terms] OR "DVT" [All Fields] OR "thromboembolism"[All Fields] OR "venous thromboembolism"[All Fields] OR "pulmonary embolism"[MeSH Terms] OR "pulmonary embolism"[All Fields]) AND (("severe acute respiratory syndrome coronavirus 2"[Supplementary Concept] OR "severe acute respiratory syndrome coronavirus 2"[All Fields] OR "sars cov 2"[All Fields] OR (novel[All Fields] AND ("coronavirus"[MeSH Terms] OR "coronavirus"[All Fields])) OR nCoV[All Fields] OR ("severe acute respiratory syndrome coronavirus 2"[Supplementary Concept] OR "severe acute respiratory syndrome coronavirus 2"[All Fields] OR "2019 nCoV"[All Fields]) OR ("COVID-19"[All Fields] OR "COVID-2019"[All Fields] OR "severe acute respiratory syndrome coronavirus 2"[Supplementary Concept] OR "severe acute respiratory syndrome coronavirus 2"[All Fields] OR "2019-nCoV"[All Fields] OR "SARS-CoV-2"[All Fields] OR "2019nCoV"[All Fields] OR ("Wuhan"[All Fields] OR ("coronavirus"[MeSH Terms] OR "coronavirus"[All Fields])) AND (2019/12[PDAT] OR 2020[PDAT]))) Sort by: Most Recent

#### **Embase**

('thrombosis'/exp OR 'peripheral occlusive artery disease'/exp OR 'ischemia'/exp OR 'cerebrovascular accident'/exp OR 'infarction'/exp OR 'acute coronary syndrome'/exp OR 'vein thrombosis'/exp OR 'deep vein thrombosis'/exp OR 'venous thromboembolism'/exp OR 'thromboembolism'/exp OR 'lung embolism'/exp) AND ('severe acute respiratory syndrome coronavirus 2'/exp OR 'sars-related coronavirus'/exp OR 'coronavirus infection'/exp OR 'coronavirus disease 2019'/exp)

#### **Google Scholar**

Stroke OR myocardial OR infarction OR thrombosis OR DVT OR "pulmonary embolism"

AND

"covid-19" OR "SARS-CoV-2" or "coronavirus"

**FIGURES**

**Figure S1** – Funnel plot for venous (A) and arterial (B) thromboembolism. The visual inspection suggested visual plot asymmetry, especially for venous thromboembolism.

**Figure S2** – Forest plot showing the weighted pooled prevalence of pulmonary embolism according to patient population.

ICU: intensive care unit

**Figure S3** – Forest plot showing the weighted pooled prevalence of deep venous thrombosis according to patient population.

ICU: intensive care unit

**Figure S4** – Forest plot showing the weighted pooled prevalence of subsegmental pulmonary embolism.

**Figure S5** – Forest plot showing the weighted pooled prevalence of leg proximal and distal deep venous thrombosis and other venous thrombosis including superficial and catheter related thrombosis.

DVT : deep venous thrombolism.

**Figure S6** – Forest plot showing the weighted pooled prevalence of proximal deep venous thrombosis according to patient population.

ICU: intensive care unit

**Figure S7** – Forest plot showing the weighted pooled prevalence of venous thromboembolism according to study design.

**Table 1** – Study characteristics

| Study                                 | Country     | Patients in ICU | Nb of patients | Mean follow-up (days) | Design                | Diagnostic of COVID-19 | Male sex | Mean age (y) | Diagnosis of thrombotic event                          | Death rate | AG   | D-Dimer (µg/L) |
|---------------------------------------|-------------|-----------------|----------------|-----------------------|-----------------------|------------------------|----------|--------------|--------------------------------------------------------|------------|------|----------------|
| Aleva et al. <sup>57</sup>            | Netherlands | 100%            | 50             | 86                    | NA, C, m              | RT-PCR                 | 66%      | 65           | Symptomatic testing                                    | 26%        | 100% | NA             |
| Alharthy et al. <sup>58</sup>         | USA         | 100%            | 85             | 28                    | P, C, m               | RT-PCR                 | 43%      | 43           | Asymptomatic screening (DVT), Symptomatic testing (PE) | 28%        | 100% | 6400           |
| Annie et al. <sup>59</sup>            | Intern.     | NA              | 9358           | >17                   | R, C, M               | RT-PCR                 | 40%      | <50          | NA                                                     | 1%         | NA   | NA             |
| Aversa et al. <sup>60</sup>           | USA         | 34%             | 27             | 44                    | R, C, m**             | RT-PCR                 | 50%      | 65           | Symptomatic testing                                    | 41%        | NA   | 2600           |
| Alonso-Fernandez et al. <sup>61</sup> | Spain       | 38%             | 30             | 20                    | P, C, m <sup>@</sup>  | RT-PCR                 | 63%      | 65           | Asymptomatic screening                                 | 0%         | 44%  | 2400           |
| Al-Samkari et al. <sup>17</sup>       | USA         | 36%             | 400            | 8                     | R, NC, M <sup>+</sup> | RT-PCR                 | 58%      | 62           | Symptomatic testing                                    | 8%         | 100% | NA             |
| Artifoni et al. <sup>62</sup>         | France      | 18%             | 71             | NA                    | R, C, M               | RT-PCR or CT-scan      | 61%      | 64           | Asymptomatic screening                                 | NA         | 99%  | 790            |
| Beigel et al. <sup>63</sup>           | Intern.     | 44%             | 1063           | 29                    | P, C, M               | RT-PCR                 | 64%      | 59           | Symptomatic testing                                    | NA         | NA   | NA             |
| Benito et al. <sup>64</sup>           | Spain       | NA              | 1275           | NA                    | P, C, m               | RT-PCR                 | NA       | NA           | Symptomatic testing                                    | 12%        | NA   | NA             |

| Study                            | Country     | Patients in ICU | Nb of patients | Mean follow-up (days) | Design    | Diagnostic of COVID-19 | Male sex | Mean age (y) | Diagnosis of thrombotic event | Death rate | AG   | D-Dimer (µg/L) |
|----------------------------------|-------------|-----------------|----------------|-----------------------|-----------|------------------------|----------|--------------|-------------------------------|------------|------|----------------|
| Betoule et al. <sup>65</sup>     | France      | 19%             | 76             | NA                    | NA, R, m  | RT-PCR                 | 50%      | 62           | NA                            | 4%         | NA   | NA             |
| Beun et al. <sup>66</sup>        | Netherlands | 100%            | 75             | NA                    | NA, NA, m | NA                     | NA       | 61           | NA                            | NA         | NA   | 486            |
| Beyls et al. <sup>67</sup>       | France      | 100%            | 12             | NA                    | NA, NA, m | RT-PCR                 | 83%      | 62           | Symptomatic testing           | 17%        | 100% | 8300           |
| Bilaloglu et al. <sup>18</sup>   | USA         | 25%             | 3334           | NA                    | NA, C, m  | RT-PCR                 | 61       | 64           | Symptomatic testing           | 25%        | NA   | NA             |
| Bompard et al. <sup>68</sup>     | France      | 24%             | 135            | 27                    | R, NC, m  | NA                     | 70%      | 64           | Symptomatic testing           | 12%        | 100% | 1600           |
| Bonnazi et al.                   | Italy       | NA              | 942            | NA                    | R, NC, m  | NA                     | NA       | NA           | Symptomatic testing           | NA         | NA   | NA             |
| Cantador et al. <sup>69</sup>    | Spain       | NA              | 1419           | NA                    | R, NA, m  | NA                     | NA       | NA           | Symptomatic testing           | NA         | NA   | NA             |
| Campochiaro et al. <sup>70</sup> | Italy       | 33%             | 65             | 28                    | R, NA, m  | RT-PCR                 | 28%      | 62           | Symptomatic testing           | 25%        | NA   | NA             |
| Cattaneo et al. <sup>4</sup>     | Italy       | 0%              | 64             | 9                     | R, NC, m  | NA                     | 55%      | 70           | Asymptomatic screening        | NA         | 100% | 458            |
| Cho et al. <sup>71</sup>         | USA         | NA              | 1170           | NA                    | R, C, m   | RT-PCR                 | NA       | NA           | Symptomatic testing           | NA         | NA   | NA             |
| Choi et al. <sup>72</sup>        | USA         | 27%             | 1739           | 7                     | R, C, m   | RT-PCR                 | 59%      | 67           | Symptomatic testing           | 18%        | 100% | 565            |

| Study                             | Country | Patients in ICU | Nb of patients | Mean follow-up (days) | Design   | Diagnostic of COVID-19 | Male sex | Mean age (y) | Diagnosis of thrombotic event                          | Death rate | AG   | D-Dimer (µg/L) |
|-----------------------------------|---------|-----------------|----------------|-----------------------|----------|------------------------|----------|--------------|--------------------------------------------------------|------------|------|----------------|
| Cui et al. <sup>15</sup>          | China   | 100%            | 81             | 14                    | R, NA, m | RT-PCR and CT-scan     | 46%      | 60           | Symptomatic testing                                    | 10%        | NA   | 1887           |
| Desborough et al. <sup>50</sup>   | UK      | 100%            | 66             | 30                    | R, C, m  | NA                     | 73%      | 59           | Symptomatic testing                                    | 30%        | 100% | 2400           |
| Du et al.                         | China   | NA              | 196            | NA                    | R, C, m  | RT-PCR                 | 84%      | 62           | Symptomatic testing                                    | 4%         | NA   | NA             |
| Dubois-Silva et al. <sup>73</sup> | Spain   | 0%              | 171            | NA                    | R, C, m  | RT-PCR and serology    | NA       | NA           | Symptomatic testing (PE), asymptomatic screening (DVT) | NA         | NA   | NA             |
| Dumantepe et al. <sup>74</sup>    | Turkey  | NA              | 352            | NA                    | R, C, m  | RT-PCR                 | 64%      | 56           | Symptomatic testing                                    | 3%         | 100  | 1380           |
| Espallargas et al. <sup>75</sup>  | Spain   | NA              | 910            | NA                    | R, C, m  | RT-PCR and CT-scan     | NA       | NA           | Symptomatic testing                                    | NA         | NA   | NA             |
| Etkin et al. <sup>76</sup>        | USA     | 14%             | 12630          | 7                     | R, C, M  | NA                     | 76%      | 67           | Symptomatic testing                                    | 10%        | NA   | 438            |
| Fan et al. <sup>77</sup>          | China   | 100%            | 86             | 35                    | R, NC, m | RT-PCR or serology     | 63%      | 67           | Symptomatic testing                                    | 64%        | 56   | 9000           |
| Fauvel et al. <sup>78</sup>       | France  | 15%             | 1240           | NA                    | R, C, M  | RT-PCR and CT-scan     | 64%      | 64           | Symptomatic testing                                    | 12%        | 71%  | 1642           |

| Study                                      | Country     | Patients in ICU | Nb of patients | Mean follow-up (days) | Design    | Diagnostic of COVID-19 | Male sex | Mean age (y) | Diagnosis of thrombotic event | Death rate | AG   | D-Dimer (µg/L) |
|--------------------------------------------|-------------|-----------------|----------------|-----------------------|-----------|------------------------|----------|--------------|-------------------------------|------------|------|----------------|
| Fraissé et al. <sup>51</sup>               | France      | 100%            | 92             | NA                    | R, C, m   | NA                     | 79%      | 61           | Symptomatic testing           | 41%        | 100% | 2400           |
| Freund et al. <sup>79</sup>                | Intern.     | NA              | 974            | NA                    | R, NC, M  | RT-PCR and CT-scan     | NA       | NA           | Symptomatic testing           | NA         | NA   | NA             |
| Galaneo-Valle et al. <sup>80</sup>         | Spain       | NA              | 156            | 9                     | P, C, m   | RT-PCR and CT-scan     | NA       | NA           | Symptomatic testing           | NA         | NA   | NA             |
| Gervaise et al.                            | France      | NA              | 146            | 8                     | R, C, m   | RT-PCR and CT-scan     | 75%      | 62           | CPTA series                   | 15%        | NA   | 3610           |
| Giorgi-Pierfranceschi et al. <sup>81</sup> | Italy       | NA              | 66             | 13                    | NA, NA, m | RT-PCR                 | 46%      | 72           | Asymptomatic screening        | NA         | 96%  | 329            |
| Friedmann et al. <sup>82</sup>             | Canada      | NA              | 99             | NA                    | NA, NA, m | NA                     | NA       | NA           | NA                            | NA         | NA   | NA             |
| Grandmaison et al. <sup>83</sup>           | Switzerland | 100%            | 29             | NA                    | P, C, m   | NA                     | 65%      | 66           | Asymptomatic screening        | NA         | 88%  | NA             |
| Hanif et al. <sup>84</sup>                 | USA         | 35%             | 921            | 9                     | R, C, m   | RT-PCR                 | 62%      | 62           | Symptomatic testing           | NA         | 97%  | 3190           |
| Helms et al. <sup>36##</sup>               | France      | 100%            | 150            | 10                    | P, C, M   | RT-PCR                 | 81%      | 63           | Symptomatic testing           | 9%         | 100% | 2270           |

| Study                                 | Country     | Patients in ICU | Nb of patients | Mean follow-up (days) | Design                | Diagnostic of COVID-19 | Male sex | Mean age (y) | Diagnosis of thrombotic event | Death rate | AG   | D-Dimer (µg/L) |
|---------------------------------------|-------------|-----------------|----------------|-----------------------|-----------------------|------------------------|----------|--------------|-------------------------------|------------|------|----------------|
| Huet et al. <sup>85</sup>             | France      | 8%              | 96             | <20                   | P, C, m <sup>++</sup> | RT-PCR and CT-scan     | 64%      | NA           | Symptomatic testing           | NA         | NA   | NA             |
| Hippensteel et al. <sup>86</sup>      | USA         | 100%            | 91             | 26                    | R, NC, m              | NA                     | 58%      | 56           | Symptomatic testing           | 43%        | NA   | NA             |
| Inciardi et al.                       | Italy       | 12%             | 99             | 14                    | R, C, m               | RT-PCR                 | 80%      | 67           | Symptomatic testing           | 26%        | NA   | 576            |
| Jimenez-Guiu et al. <sup>87</sup>     | Spain       | 0%              | 57             | 9                     | P, C, m               | RT-PCR and CT-scan     | 51%      | 57           | Systematic testing            | NA         | 100% | NA             |
| Kartsios et al. <sup>88</sup>         | UK          | NA              | 1583           | NA                    | R, C, m               | RT-PCR                 | NA       | NA           | Systematic testing            | NA         | NA   | NA             |
| Klok et al. <sup>53</sup>             | Netherlands | 100%            | 184            | 14                    | NA, NA, M             | RT-PCR                 | 76%      | 64           | Symptomatic testing           | 22%        | 100% | NA             |
| Koleitat et al. <sup>89</sup>         | USA         | NA              | 135            | 7                     | R, C, m               | RT-PCR                 | 56%      | 63           | DUS series                    | 15%        | 84%  | NA             |
| Leonard-Lorant et al. <sup>25##</sup> | France      | 43%             | 106            | 30                    | P, C, m               | RT-PCR and CT-scan     | 43%      | 64           | Symptomatic testing           | NA         | 47%  | 15385          |
| Larsen et al. <sup>90</sup>           | France      | 11%             | 35             | 40                    | NA, C, m <sup>u</sup> | RT-PCR and CT-scan     | 77%      | 66           | Asymptomatic screening        | 0%         | 80%  | 1220           |

| Study                           | Country     | Patients in ICU | Nb of patients | Mean follow-up (days) | Design  | Diagnostic of COVID-19 | Male sex | Mean age (y) | Diagnosis of thrombotic event                          | Death rate | AG   | D-Dimer (µg/L) |
|---------------------------------|-------------|-----------------|----------------|-----------------------|---------|------------------------|----------|--------------|--------------------------------------------------------|------------|------|----------------|
| Lejeune et al. <sup>91</sup>    | France      | 7%              | 42             | 11                    | R, C, m | RT-PCR and CT-scan     | 55%      | 65           | Asymptomatic screening (DVT), symptomatic testing (EP) | 5%         | 100% | 1414           |
| Lendorf et al. <sup>92</sup>    | Denmark     | 18%             | 111            | 6                     | R, C, m | RT-PCR                 | 56%      | 69           | Symptomatic testing                                    | 14%        | NA   | 1200           |
| Llitjos et al. <sup>5</sup>     | France      | 100%            | 26             | NA                    | R, C, M | RT-PCR                 | 77%      | 68           | Asymptomatic screening                                 | 12%        | 100% | 1750           |
| Li et al. <sup>93</sup>         | China       | NA              | 219            | NA                    | R, C, m | RT-PCR and CT-scan     | 41%      | 53           | Symptomatic testing                                    | NA         | NA   | NA             |
| Lodigiani et al.                | Italy       | 15%             | 388            | 10                    | R, C, m | NA                     | 61%      | 69           | Symptomatic testing                                    | 26%        | 79%  | 3000           |
| Longchamp et al. <sup>94</sup>  | Switzerland | 100%            | 25             | NA                    | P, C, m | RT-PCR                 | 64%      | 68           | Asymptomatic screening                                 | NA         | 100% | 2071           |
| Longhitano et al. <sup>95</sup> | Italy       | 100%            | 62             | NA                    | R, C, m | RT-PCR                 | NA       | NA           | Symptomatic testing                                    | NA         | 100% | NA             |
| Maatman et al. <sup>96</sup>    | USA         | 100%            | 109            | NA                    | R, C, M | RT-PCR                 | 62%      | 61           | Symptomatic testing                                    | 16%        | 100% | 506            |
| Marone et al. <sup>97</sup>     | Italy       | 10%             | 101            | NA                    | P, C, M | NA                     | NA       | NA           | DUS series                                             | NA         | NA   | NA             |



| Study                                 | Country    | Patients in ICU | Nb of patients | Mean follow-up (days) | Design   | Diagnostic of COVID-19           | Male sex | Mean age (y) | Diagnosis of thrombotic event    | Death rate | AG   | D-Dimer (µg/L) |
|---------------------------------------|------------|-----------------|----------------|-----------------------|----------|----------------------------------|----------|--------------|----------------------------------|------------|------|----------------|
| Mationi et al. <sup>98</sup>          | Italy      | 0%              | 105            | 36                    | R, C, m  | RT-PCR and CT-scan               | 58%      | 74           | Symptomatic testing              | 21%        | 100% | 1437           |
| Mei et al. <sup>99</sup>              | China      | NA              | 256            | 14                    | R, NA, m | RT-PCR, gene assay, and CT-scan  | 56%      | 59           | Symptomatic testing              | 6%         | 100% | 510            |
| Mestre-Gomez et al. <sup>100</sup>    | Spain      | 0%              | 452            | NA                    | R, C, m  | WHO clinical criteria and RT-PCR | NA       | NA           | Symptomatic testing              | NA         | NA   | NA             |
| Middeldorp et al. <sup>26</sup>       | Netherland | 38%             | 198            | >17                   | R, C, m  | RT-PCR and CT-scan               | 66%      | 62           | Symptomatic testing <sup>f</sup> | 19%        | 94%  | 2000           |
| Moll et al. <sup>52</sup>             | USA        | 48%             | 210            | 7                     | R, NA, m | RT-PCR                           | 48%      | 62           | Symptomatic testing              | 17%        | 90%  | NA             |
| Monfardini et al. <sup>101</sup>      | Italy      | NA              | 1207           | NA                    | R, C, m  | RT-PCR                           | NA       | NA           | Symptomatic testing              | NA         | NA   | NA             |
| Mouhat et al. <sup>102</sup>          | France     | 20%             | 349            | NA                    | R, C, m  | RT-PCR                           | 67%      | 66           | Symptomatic testing              | NA         | NA   | 1920           |
| Mueller-Peltzer et al. <sup>103</sup> | Germany    | 100%            | 16             | 23                    | R, NC, m | RT-PCR                           | 73       | 60           | Asymptomatic screening           | 45%        | NA   | 460            |

| Study                            | Country | Patients in ICU | Nb of patients | Mean follow-up (days) | Design    | Diagnostic of COVID-19 | Male sex | Mean age (y) | Diagnosis of thrombotic event                          | Death rate | AG   | D-Dimer (µg/L) |
|----------------------------------|---------|-----------------|----------------|-----------------------|-----------|------------------------|----------|--------------|--------------------------------------------------------|------------|------|----------------|
| Nahum et al. <sup>104</sup>      | France  | 100%            | 34             | NA                    | P, C, m   | NA                     | 78%      | 62           | Asymptomatic screening                                 | 0%         | 100% | 5100           |
| Naygamon et al. <sup>105</sup>   | USA     | NA              | 1065           | NA                    | R, C, M   | RT-PCR                 | NA       | NA           | Symptomatic testing                                    | NA         | NA   | NA             |
| Pavoni et al. <sup>106</sup>     | Italy   | 100%            | 44             | 30                    | R, NA, m  | RT-PCR                 | 64       | 64           | Asymptomatic screening (DVT), symptomatic testing (EP) | 21%        | 100% | NA             |
| Patell et al. <sup>107</sup>     | USA     | 51%             | 398            | 8                     | R, C, m   | RT-PCR                 | 49%      | ≈64          | Symptomatic testing                                    | 21%        | 93%  | NA             |
| Piagnereli et al. <sup>108</sup> | Belgium | 100%            | 19             | 19                    | NA, NA, m | RT-PCR                 | NA       | 58           | Symptomatic testing                                    | 26%        | 100% | 1620           |
| Poissy et al. <sup>27#</sup>     | France  | 100%            | 107            | 7                     | NA, C, m  | RT-PCR and CT-scan     | 59%      | 57           | Symptomatic testing                                    | 14%        | 91%  | NA             |
| Pesavento et al.                 | Italy   | 3%              | 322            | 30                    | R, C, M   | RT-PCR                 | 56       | 71           | Symptomatic testing                                    | 13%        | 100% | 1279           |
| Pizzolo et al. <sup>109</sup>    | Italy   | 0%              | 42             | NA                    | P, C, m   | RT-PCR                 | 67%      | 66           | Systematic testing                                     | NA         | NA   | NA             |
| Poyiadji et al. <sup>110</sup>   | USA     | 25%             | 328            | NA                    | R, NC, M  | RT-PCR                 | 46%      | 61           | CTPA series                                            | 9%         | 37%  | NA             |

| Study                              | Country         | Patients in ICU | Nb of patients | Mean follow-up (days) | Design   | Diagnostic of COVID-19 | Male sex | Mean age (y) | Diagnosis of thrombotic event | Death rate | AG   | D-Dimer (µg/L) |
|------------------------------------|-----------------|-----------------|----------------|-----------------------|----------|------------------------|----------|--------------|-------------------------------|------------|------|----------------|
| Rali et al. <sup>111</sup>         | USA             | NA              | 703            | NA                    | R, C, m  | RT-PCR and CT-scan     | NA       | NA           | Symptomatic testing           | NA         | 100% | NA             |
| Rauch et al. <sup>112#</sup>       | France          | 31%             | 243            | 30                    | P, C, m  | RT-PCR and CT-scan     | 64       | 64%          | Symptomatic testing           | 13%        | 100% | 1000           |
| Rieder et al. <sup>113</sup>       | Germany         | 16%             | 49             | 30                    | P, C, m  | RT-PCR                 | 61%      | 60           | Symptomatic testing           | 6%         | NA   | 1200           |
| Ren et al. <sup>114</sup>          | China           | 100%            | 48             | 23                    | P, NC    | NA                     | 54%      | 70           | Asymptomatic screening        | 31%        | 98%  | 3480           |
| Shah et al. <sup>115</sup>         | UK              | 100%            | 187            | 20                    | R, C, M  | RT-PCR and CT-scan     | 66%      | 57           | Symptomatic screening         | 31%        | 100% | 2587           |
| Shahjoue et al. <sup>116</sup>     | Intern.         | NA              | 6356           | NA                    | NA, C, m | RT-PCR and CT-scan     | 59%      | 58           | Symptomatic screening         | NA         | NA   | NA             |
| Santoliquido et al. <sup>117</sup> | Italy           | 0%              | 84             | 24                    | P, C, m  | RT-PCR                 | 73%      | 68           | Asymptomatic screening        | 10%        | 100% | 4108           |
| Soumagne et al. <sup>118</sup>     | France, Belgium | 100%            | 375            | 28                    | NA, C, M | RT-PCR                 | 77%      | 62           | Symptomatic testing           | 36%        | NA   | NA             |
| Siepmann et al. <sup>119</sup>     | Germany         | 23%             | 165            | NA                    | R, C, M  | RT-PCR                 | 49       | 67           | Symptomatic testing           | 20%        | NA   | 900            |

| Study                                 | Country | Patients in ICU | Nb of patients | Mean follow-up (days) | Design   | Diagnostic of COVID-19 | Male sex | Mean age (y) | Diagnosis of thrombotic event | Death rate | AG   | D-Dimer (µg/L) |
|---------------------------------------|---------|-----------------|----------------|-----------------------|----------|------------------------|----------|--------------|-------------------------------|------------|------|----------------|
| Stoneham et al. <sup>120</sup>        | UK      | NA              | 274            | NA                    | R, C, m  | RT-PCR and CT-scan     | NA       | NA           | Symptomatic testing           | NA         | NA   | NA             |
| Stefely et al.                        | USA     | 100%            | 102            | 78                    | P, C, m  | RT-PCR                 | 67%      | 68           | Symptomatic testing           | 22%        | 100% | 2849           |
| Stessel et al. <sup>121</sup>         | Belgium | 100%            | 82             | 30                    | P, C, m  | RT-PCR                 | 82%      | 66           | Asymptomatic screening        | 26%        | 100% | NA             |
| Studart-Neto et al. <sup>122</sup>    | Brazil  | NA              | 1208           | NA                    | R, C, m  | RT-PCR                 | NA       | NA           | Symptomatic testing           | NA         | NA   | NA             |
| Taccone et al. <sup>123</sup>         | Belgium | 100%            | 82             | 27                    | P, C, m  | RT-PCR                 | NA       | NA           | Symptomatic testing           | NA         | 100% | NA             |
| Tavazzi et al. <sup>54</sup>          | Italy   | 100%            | 54             | NA                    | NA, C, m | NA                     | 83%      | 68           | Symptomatic testing           | NA         | 100% | NA             |
| Thomas et al. <sup>7</sup>            | UK      | 100%            | 63             | 8                     | R, C, m  | RT-PCR                 | NA       | NA           | Symptomatic testing           | 16%        | 100% | NA             |
| Torres-Machorro et al. <sup>124</sup> | Mexico  | 100%            | 30             | <9                    | P, C, m  | NA                     | 77%      | 62           | Asymptomatic screening        | 20%        | 100% | NA             |
| Trigonis et al. <sup>125</sup>        | USA     | 100%            | 45             | NA                    | R, NC, m | NA                     | NA       | 61           | Symptomatic testing           | NA         | 100% | 4046           |
| Trimaille et al. <sup>126</sup>       | France  | 25%             | 289            | 12                    | NA, C, m | RT-PCR and CT-scan     | 59%      | 62           | Symptomatic testing           | 12%        | NA   | 3874           |

| Study                           | Country     | Patients in ICU | Nb of patients | Mean follow-up (days) | Design     | Diagnostic of COVID-19 | Male sex | Mean age (y) | Diagnosis of thrombotic event | Death rate | AG   | D-Dimer (µg/L) |
|---------------------------------|-------------|-----------------|----------------|-----------------------|------------|------------------------|----------|--------------|-------------------------------|------------|------|----------------|
| Violi et al.                    | Italy       | 73%             | 93             | 15                    | NA, NA, m  | RT-PCR                 | 81%      | 68           | Symptomatic testing           | NA         | 100% | 3166           |
| Voicu et al. <sup>127</sup>     | France      | 100%            | 56             | 10                    | P, C, m    | NA                     | 75%      | NA           | Asymptomatic screening        | NA         | 100% | NA             |
| Whyte et al. <sup>128</sup>     | UK          | 16%             | 1477           | NA                    | R, C, m    | NA                     | NA       | NA           | Symptomatic testing           | 16%        | NA   | NA             |
| Xing et al. <sup>129</sup>      | China       | 55%             | 20             | 28                    | NA, NA, m  | NA                     | NA       | NA           | Asymptomatic screening        | NA         | NA   | NA             |
| Yaghi et al. <sup>130</sup>     | USA         | NA              | 3556           | NA                    | R, C, M    | NA                     | NA       | NA           | Symptomatic testing           | NA         | NA   | NA             |
| Yu et al. <sup>131</sup>        | China       | NA              | 142            | 31                    | R, C, m    | RT-PCR and serology    | 57%      | 62           | Asymptomatic screening        | 23%        | 26%  | 2600           |
| Zangrillo et al. <sup>132</sup> | Italy       | 100%            | 73             | 19                    | R, C, m    | RT-PCR                 | 84%      | 61           | Symptomatic testing           | 23%        | 100% | 1010           |
| Zermatten et al.                | Switzerland | 100%            | 100            | NA                    | R, NC, m   | RT-PCR                 | 74%      | 64           |                               | 28%        | 100% | 6888           |
| Zhang et al. <sup>133</sup>     | China       | 11%             | 143            | 19                    | R, C, m**  | RT-PCR                 | 74%      | 63           | Asymptomatic screening        | 22%        | 37%  | NA             |
| Zhang et al. <sup>134</sup>     | China       | 38%             | 28             | NA                    | R, NA, M** | RT-PCR                 | 61%      | 65           | Symptomatic testing           | 29%        | NA   | NA             |

AG, anticoagulation (curative or prophylactic dose); C, consecutive; CT-scan: computerized tomography scanner; DVT: deep venous thrombosis; Intern: international; m, monocentric; M, multicentric; NA, not available; Nb, number; NC, non-consecutive; P, prospective; PE, pulmonary embolism, R, retrospective;

RT-PCR: reverse transcriptase- polymerase chain reaction; UK, United Kingdom; VTE, venous thromboembolism; y, years. \* patients with lung transplant

\*\*patients with active cancer ‡ Screening of DTV in 55 patients + patients having D-dimer test @ patients with D-dimer >1 µg/mL ++ patients receiving anakinra # traveler series # and ## patients overlapped between series.

**Table S2** – Quality assessment using the MINORS tools

| <b>Study</b>            | <b>Aim<sup>a</sup></b> | <b>Rate<sup>b</sup></b> | <b>Data<sup>c</sup></b> | <b>Measure<sup>d</sup></b> | <b>Bias<sup>e</sup></b> | <b>Time<sup>f</sup></b> | <b>Loss<sup>g</sup></b> | <b>Size<sup>h</sup></b> | <b>Total<sup>i</sup></b> |
|-------------------------|------------------------|-------------------------|-------------------------|----------------------------|-------------------------|-------------------------|-------------------------|-------------------------|--------------------------|
| Aleva et al.            | 1                      | 2                       | 0                       | 0                          | 0                       | 2                       | 0                       | 0                       | 5                        |
| Annie et al.            | 2                      | 2                       | 1                       | 2                          | 0                       | 1                       | 0                       | 0                       | 8                        |
| Alharty et al.          | 2                      | 2                       | 2                       | 2                          | 0                       | 2                       | 0                       | 0                       | 10                       |
| Alonso-Fernandez et al. | 1                      | 1                       | 2                       | 2                          | 0                       | 0                       | 2                       | 0                       | 8                        |
| Artifoni et al.         | 1                      | 0                       | 1                       | 2                          | 0                       | 2                       | 1                       | 0                       | 7                        |
| Al-Samkari et al.       | 2                      | 1                       | 1                       | 2                          | 0                       | 0                       | 0                       | 0                       | 6                        |
| Aversa et al.           | 0                      | 2                       | 0                       | 0                          | 0                       | 2                       | 2                       | 2                       | 8                        |
| Beigel et al.           | 1                      | 2                       | 2                       | 0                          | 0                       | 2                       | 1                       | 0                       | 8                        |
| Benito et al.           | 2                      | 2                       | 2                       | 2                          | 0                       | 0                       | 0                       | 0                       | 8                        |
| Betoule et al.          | 2                      | 0                       | 0                       | 0                          | 0                       | 0                       | 0                       | 0                       | 2                        |
| Beun et al.             | 1                      | 0                       | 0                       | 0                          | 0                       | 0                       | 0                       | 0                       | 1                        |
| Bilaloglu et al.        | 2                      | 2                       | 0                       | 0                          | 0                       | 0                       | 0                       | 0                       | 4                        |
| Bompard et al.          | 1                      | 1                       | 1                       | 2                          | 0                       | 0                       | 0                       | 0                       | 5                        |
| Bozzani et al.          | 2                      | 0                       | 0                       | 0                          | 0                       | 0                       | 0                       | 0                       | 2                        |

| Study                   | Aim <sup>a</sup> | Rate <sup>b</sup> | Data <sup>c</sup> | Measure <sup>d</sup> | Bias <sup>e</sup> | Time <sup>f</sup> | Loss <sup>g</sup> | Size <sup>h</sup> | Total <sup>i</sup> |
|-------------------------|------------------|-------------------|-------------------|----------------------|-------------------|-------------------|-------------------|-------------------|--------------------|
| Campochiaro et al.      | 1                | 0                 | 1                 | 0                    | 0                 | 2                 | 2                 | 0                 | 6                  |
| Cantador et al.         | 2                | 0                 | 1                 | 0                    | 0                 | 0                 | 0                 | 0                 | 3                  |
| Cattaneo et al.         | 2                | 1                 | 1                 | 0                    | 0                 | 1                 | 2                 | 0                 | 7                  |
| Cho et al.              | 2                | 2                 | 1                 | 0                    | 0                 | 0                 | 0                 | 0                 | 5                  |
| Choi et al.             | 2                | 2                 | 1                 | 2                    | 0                 | 1                 | 0                 | 0                 | 8                  |
| Cui et al.              | 2                | 0                 | 1                 | 0                    | 0                 | 1                 | 0                 | 0                 | 4                  |
| Demelo-Rodríguez et al. | 2                | 0                 | 2                 | 2                    | 2                 | 2                 | 2                 | 0                 | 12                 |
| Desborough et al.       | 2                | 1                 | 1                 | 2                    | 0                 | 0                 | 2                 | 0                 | 8                  |
| Dubois-Silva et al.     | 2                | 2                 | 1                 | 2                    | 0                 | 0                 | 0                 | 0                 | 7                  |
| Dumantepe et al.        | 2                | 2                 | 1                 | 2                    | 0                 | 0                 | 2                 | 0                 | 9                  |
| Du et al.               | 1                | 1                 | 2                 | 0                    | 0                 | 0                 | 0                 | 0                 | 4                  |
| Espallargas et al       | 2                | 2                 | 1                 | 2                    | 0                 | 0                 | 0                 | 0                 | 7                  |
| Etkin et al.            | 2                | 2                 | 1                 | 0                    | 0                 | 0                 | 0                 | 0                 | 5                  |
| Fan et al.              | 2                | 1                 | 1                 | 2                    | 0                 | 2                 | 0                 | 0                 | 8                  |
| Fauvel et al.           | 2                | 2                 | 1                 | 2                    | 0                 | 0                 | 2                 | 0                 | 9                  |



| Study                        | Aim <sup>a</sup> | Rate <sup>b</sup> | Data <sup>c</sup> | Measure <sup>d</sup> | Bias <sup>e</sup> | Time <sup>f</sup> | Loss <sup>g</sup> | Size <sup>h</sup> | Total <sup>i</sup> |
|------------------------------|------------------|-------------------|-------------------|----------------------|-------------------|-------------------|-------------------|-------------------|--------------------|
| Fraissé et al.               | 2                | 2                 | 1                 | 0                    | 0                 | 0                 | 2                 | 0                 | 7                  |
| Freund et al.                | 2                | 0                 | 1                 | 2                    | 0                 | 0                 | 0                 | 0                 | 5                  |
| Fridman et al.               | 2                | 0                 | 0                 | 0                    | 0                 | 0                 | 0                 | 0                 | 2                  |
| Galaneo-Valle et al.         | 2                | 2                 | 2                 | 2                    | 2                 | 2                 | 2                 | 0                 | 14                 |
| Gervaise et al.              | 1                | 2                 | 1                 | 2                    | 2                 | 0                 | 0                 | 0                 | 8                  |
| Giorgi-Pierfranceschi et al. | 2                | 0                 | 0                 | 0                    | 0                 | 1                 | 0                 | 0                 | 3                  |
| Grandmaison et al.           | 2                | 2                 | 2                 | 0                    | 0                 | 0                 | 0                 | 0                 | 6                  |
| Hanif et al.                 | 2                | 2                 | 1                 | 0                    | 0                 | 1                 | 0                 | 0                 | 6                  |
| Helms et al.                 | 2                | 2                 | 2                 | 2                    | 1                 | 1                 | 2                 | 0                 | 12                 |
| Hippensteel et al.           | 2                | 1                 | 1                 | 2                    | 0                 | 1                 | 2                 | 0                 | 9                  |
| Huet et al.                  | 1                | 2                 | 2                 | 0                    | 0                 | 0                 | 0                 | 0                 | 5                  |
| Jimenez-Guiu et al.          | 2                | 2                 | 2                 | 2                    | 1                 | 0                 | 0                 | 0                 | 9                  |
| Kartsios et al.              | 2                | 2                 | 1                 | 0                    | 0                 | 0                 | 0                 | 0                 | 5                  |
| Klok et al.                  | 2                | 0                 | 0                 | 2                    | 0                 | 1                 | 2                 | 0                 | 7                  |
| Koleitat et al.              | 2                | 2                 | 1                 | 0                    | 0                 | 1                 | 0                 | 0                 | 6                  |

| Study                 | Aim <sup>a</sup> | Rate <sup>b</sup> | Data <sup>c</sup> | Measure <sup>d</sup> | Bias <sup>e</sup> | Time <sup>f</sup> | Loss <sup>g</sup> | Size <sup>h</sup> | Total <sup>i</sup> |
|-----------------------|------------------|-------------------|-------------------|----------------------|-------------------|-------------------|-------------------|-------------------|--------------------|
| Inciardi et al.       | 1                | 2                 | 1                 | 0                    | 0                 | 1                 | 0                 | 0                 | 5                  |
| Larsen et al.         | 2                | 0                 | 2                 | 2                    | 0                 | 2                 | 2                 | 0                 | 10                 |
| Leonard-Lorant et al. | 1                | 2                 | 2                 | 2                    | 0                 | 2                 | 1                 | 0                 | 10                 |
| Lejeune et al.        | 2                | 2                 | 1                 | 2                    | 2                 | 1                 | 0                 | 0                 | 10                 |
| Lendorf et al.        | 1                | 2                 | 1                 | 0                    | 0                 | 0                 | 0                 | 0                 | 4                  |
| Llitjos et al.        | 2                | 2                 | 1                 | 2                    | 2                 | 0                 | 2                 | 0                 | 11                 |
| Lodigiani et al.      | 2                | 2                 | 1                 | 2                    | 0                 | 1                 | 0                 | 0                 | 8                  |
| Longchamp et al.      | 2                | 2                 | 2                 | 2                    | 0                 | 0                 | 2                 | 0                 | 10                 |
| Longhitano et al.     | 2                | 2                 | 1                 | 0                    | 0                 | 0                 | 0                 | 0                 | 5                  |
| Li et al.             | 2                | 2                 | 1                 | 2                    | 0                 | 0                 | 0                 | 0                 | 7                  |
| Maatman et al.        | 2                | 2                 | 1                 | 2                    | 0                 | 0                 | 2                 | 0                 | 9                  |
| Mattioli et al.       | 1                | 2                 | 1                 | 0                    | 0                 | 2                 | 2                 | 0                 | 8                  |
| Marone et al.         | 2                | 2                 | 2                 | 2                    | 0                 | 0                 | 0                 | 0                 | 8                  |
| Mei et al.            | 2                | 0                 | 1                 | 2                    | 0                 | 1                 | 0                 | 0                 | 6                  |
| Mestre-Gomez et al.   | 2                | 0                 | 1                 | 2                    | 0                 | 0                 | 0                 | 0                 | 5                  |

| Study                  | Aim <sup>a</sup> | Rate <sup>b</sup> | Data <sup>c</sup> | Measure <sup>d</sup> | Bias <sup>e</sup> | Time <sup>f</sup> | Loss <sup>g</sup> | Size <sup>h</sup> | Total <sup>i</sup> |
|------------------------|------------------|-------------------|-------------------|----------------------|-------------------|-------------------|-------------------|-------------------|--------------------|
| Middeldorp et al.      | 2                | 2                 | 1                 | 2                    | 2                 | 1                 | 2                 | 0                 | 12                 |
| Moll et al.            | 2                | 0                 | 1                 | 2                    | 0                 | 1                 | 0                 | 0                 | 6                  |
| Monfardini et al.      | 2                | 2                 | 1                 | 2                    | 2                 | 0                 | 0                 | 0                 | 9                  |
| Mouhat et al.          | 2                | 2                 | 1                 | 2                    | 2                 | 0                 | 0                 | 0                 | 9                  |
| Mueller-Peltzer et al. | 2                | 1                 | 1                 | 2                    | 2                 | 0                 | 0                 | 0                 | 8                  |
| Nahum et al.           | 2                | 2                 | 2                 | 2                    | 0                 | 0                 | 2                 | 0                 | 10                 |
| Naygamon et al.        | 1                | 2                 | 1                 | 0                    | 0                 | 0                 | 0                 | 0                 | 4                  |
| Patell et al.          | 2                | 2                 | 1                 | 2                    | 0                 | 1                 | 0                 | 0                 | 8                  |
| Pavoni et al.          | 2                | 1                 | 0                 | 2                    | 0                 | 2                 | 2                 | 0                 | 9                  |
| Pesavento et al.       | 2                | 2                 | 1                 | 2                    | 0                 | 2                 | 2                 | 0                 | 11                 |
| Piagnereli et al.      | 1                | 0                 | 0                 | 0                    | 0                 | 0                 | 0                 | 0                 | 1                  |
| Pizzolo et al.         | 2                | 2                 | 2                 | 2                    | 0                 | 0                 | 0                 | 0                 | 8                  |
| Poissy et al.          | 2                | 2                 | 0                 | 0                    | 0                 | 1                 | 2                 | 0                 | 7                  |
| Poyadji et al.         | 1                | 1                 | 1                 | 2                    | 0                 | 0                 | 2                 | 0                 | 7                  |
| Rali et al.            | 2                | 2                 | 1                 | 2                    | 0                 | 0                 | 0                 | 0                 | 6                  |

| Study                         | Aim <sup>a</sup> | Rate <sup>b</sup> | Data <sup>c</sup> | Measure <sup>d</sup> | Bias <sup>e</sup> | Time <sup>f</sup> | Loss <sup>g</sup> | Size <sup>h</sup> | Total <sup>i</sup> |
|-------------------------------|------------------|-------------------|-------------------|----------------------|-------------------|-------------------|-------------------|-------------------|--------------------|
| Rauch et al.                  | 2                | 2                 | 2                 | 0                    | 0                 | 2                 | 2                 | 0                 | 10                 |
| Rieder et al.                 | 2                | 2                 | 2                 | 2                    | 0                 | 2                 | 2                 | 0                 | 12                 |
| Ren et al.                    | 2                | 1                 | 2                 | 2                    | 2                 | 1                 | 2                 | 0                 | 12                 |
| Saontoliquido et al.          | 2                | 2                 | 2                 | 2                    | 0                 | 1                 | 0                 | 0                 | 9                  |
| Shah et al.                   | 2                | 2                 | 1                 | 2                    | 0                 | 1                 | 2                 | 0                 | 10                 |
| Shahjoue et al.               | 2                | 2                 | 0                 | 2                    | 0                 | 0                 | 0                 | 0                 | 6                  |
| Siepmann et al.               | 2                | 1                 | 2                 | 2                    | 0                 | 0                 | 0                 | 0                 | 7                  |
| Soumagne et al.               | 2                | 2                 | 0                 | 0                    | 0                 | 1                 | 0                 | 0                 | 5                  |
| Stefely et al.                | 2                | 2                 | 2                 | 0                    | 0                 | 2                 | 2                 | 0                 | 10                 |
| Stessel et al.                | 2                | 2                 | 2                 | 2                    | 0                 | 2                 | 2                 | 0                 | 12                 |
| Stoneham et al.               | 2                | 2                 | 1                 | 2                    | 0                 | 0                 | 0                 | 0                 | 7                  |
| Studart-Neto et al.           | 2                | 2                 | 1                 | 2                    | 0                 | 0                 | 0                 | 0                 | 7                  |
| Taccone et al. <sup>123</sup> | 2                | 2                 | 2                 | 2                    | 2                 | 0                 | 2                 | 0                 | 12                 |
| Tavazzi et al.                | 2                | 2                 | 0                 | 0                    | 0                 | 0                 | 2                 | 0                 | 6                  |
| Thomas et al.                 | 2                | 2                 | 1                 | 0                    | 0                 | 1                 | 2                 | 2                 | 10                 |

| Study                  | Aim <sup>a</sup> | Rate <sup>b</sup> | Data <sup>c</sup> | Measure <sup>d</sup> | Bias <sup>e</sup> | Time <sup>f</sup> | Loss <sup>g</sup> | Size <sup>h</sup> | Total <sup>i</sup> |
|------------------------|------------------|-------------------|-------------------|----------------------|-------------------|-------------------|-------------------|-------------------|--------------------|
| Torres-Machorro et al. | 2                | 2                 | 2                 | 2                    | 0                 | 0                 | 0                 | 0                 | 8                  |
| Trigonis et al.        | 2                | 1                 | 1                 | 2                    | 0                 | 0                 | 0                 | 0                 | 6                  |
| Trimaille et al.       | 2                | 2                 | 0                 | 2                    | 0                 | 1                 | 0                 | 0                 | 7                  |
| Voicu et al.           | 2                | 2                 | 2                 | 2                    | 0                 | 1                 | 2                 | 0                 | 11                 |
| Xing et al.            | 2                | 0                 | 0                 | 2                    | 0                 | 2                 | 2                 | 0                 | 8                  |
| Violi et al.           | 2                | 0                 | 0                 | 0                    | 0                 | 0                 | 0                 | 0                 | 2                  |
| Whyte et al.           | 2                | 2                 | 1                 | 2                    | 0                 | 0                 | 2                 | 0                 | 9                  |
| Yaghi et al.           | 2                | 2                 | 1                 | 2                    | 0                 | 0                 | 0                 | 0                 | 7                  |
| Yu et al.              | 2                | 2                 | 1                 | 2                    | 0                 | 2                 | 0                 | 0                 | 9                  |
| Zangrillo et al.       | 1                | 2                 | 1                 | 0                    | 0                 | 1                 | 2                 | 0                 | 7                  |
| Zermatten              | 2                | 0                 | 1                 | 2                    | 0                 | 0                 | 0                 | 0                 | 5                  |
| Zhang et al.           | 2                | 2                 | 1                 | 2                    | 0                 | 1                 | 1                 | 0                 | 9                  |
| Zhang et al.           | 2                | 1                 | 1                 | 0                    | 0                 | 0                 | 0                 | 0                 | 4                  |

The items are scored 0 (not reported), 1 (reported but inadequate) or 2 (reported and adequate). The global ideal score being 16 for non-comparative studies.

<sup>a</sup> Clearly stated aim for VTE assessment (0, 1, 2 points) <sup>b</sup> Inclusion of consecutive patients (0, 1, 2) <sup>c</sup> Prospective collection of data <sup>d</sup> Endpoint appropriate to VTE (use of CPTA and DUS) (0, 2) <sup>e</sup> Unbiased assessment of the study endpoint (i.e. double blind evaluation) (0, 2) <sup>f</sup> Follow-up period  $\geq 28$  days (0, 1, 2) <sup>g</sup> Loss of follow-up  $< 5\%$  (0, 1, 2) <sup>h</sup> Prospective calculation of study size (0, 2) <sup>i</sup> Total for non-comparative studies

**Table S3** – Subgroup analysis to explore heterogeneity in estimate of arterial thromboembolism prevalence

|                                  | <b>Studies<br/>(k)</b> | <b>Patients<br/>(n)</b> | <b>Prevalence; 95%<br/>confidence<br/>interval<br/>(%)</b> | <b>I<sup>2</sup></b> | <b>p-value</b> |
|----------------------------------|------------------------|-------------------------|------------------------------------------------------------|----------------------|----------------|
| <b>Approach to ATE diagnosis</b> | -                      | -                       | -                                                          | -                    | -              |
| <b>Patients in ICU</b>           |                        |                         |                                                            |                      | 0.27           |
| >70%                             | 11                     | 1,430                   | 5.1 (2.8-8.1)                                              | 80%                  |                |
| ≤70%                             | 8                      | 6,819                   | 2.8 (0.5-6.7)                                              | 98%                  |                |
| <b>Prospective series</b>        |                        |                         |                                                            |                      | 0.06           |
| Yes                              | 2                      | 393                     | 1.7 (0.7-3.3)                                              | 3%                   |                |
| No/unknown                       | 17                     | 7,856                   | 4.3 (2.1-7.1)                                              | 96%                  |                |
| <b>Multicentric series</b>       |                        |                         |                                                            |                      | 0.91           |
| Yes                              | 5                      | 949                     | 4.2 (1.3-8.7)                                              | 86%                  |                |
| No                               | 14                     | 7,300                   | 3.9 (1.6-7.1)                                              | 96%                  |                |
| <b>Consecutive series</b>        |                        |                         |                                                            |                      | 0.78           |
| Yes                              | 10                     | 2,540                   | 3.6 (1.9-6.0)                                              | 85%                  |                |
| No/unknown                       | 9                      | 5,709                   | 4.2 (1.2-6.0)                                              | 85%                  |                |

ICU: intensive care unit; ATE: arterial thromboembolism -: all studies used symptomatic testing.

**Table S4** – Metaregression to explore heterogeneity in estimate of arterial thromboembolism prevalence. R<sup>2</sup> estimates the amount of heterogeneity accounted for by the moderators.

|                                                  | Number of studies | Beta (95% CI)*               | Intercept** | p-value | R <sup>2</sup> |
|--------------------------------------------------|-------------------|------------------------------|-------------|---------|----------------|
| Number of patients <sup>§</sup>                  | 19                | 0.0013<br>(-0.0007; 0.0034)  | 0.0346      | 0.20    | 17%            |
| Proportion of patients in ICU                    | 18                | 0.0001<br>(-0.0004 ; 0.0007) | 0.0366      | 0.6718  | 0%             |
| MINORS score                                     | 18                | 0.0008<br>(-0.0050; 0.0066)  | 0.7840      | 0.7840  | 0%             |
| D-dimers                                         | -                 | -                            | -           | -       | -              |
| Proportion of patients receiving anticoagulation | 13                | 0.0001<br>(-0.0025; 0.0027)  | 0.0221      | 0.9342  | 0%             |
| Proportion of man                                | 15                | 0.0010<br>(-0.0006 ; 0.0027) | -0.0295     | 0.2227  | 0%             |

\*Beta signification: prevalence increase or decrease for the augmentation of one unit of the variable tested; \*\* Intercept signification: rate of venous thromboembolism for a variable with null value; <sup>§</sup> per increase of 100 patients; -: less than 10 studies reported D-dimers.
